# Supplementary material for: CuZn2InTe4 quantum dots-a novel nanostructure employing a green synthesis route
Source: Royal Society of Chemistry journal article supplement (doi:10.1039/d0ra02980g), 2020-01-01
Supplement: d0ra02980g1.pdf [file d0ra02980g1.pdf]

## CuZn<sub>2</sub>InTe<sub>4</sub> quantum dots- a novel nanostructure employing a green synthesis route

Libin Kuriakose, N.J. Simi and V.V. Ison

### Supplementary Information

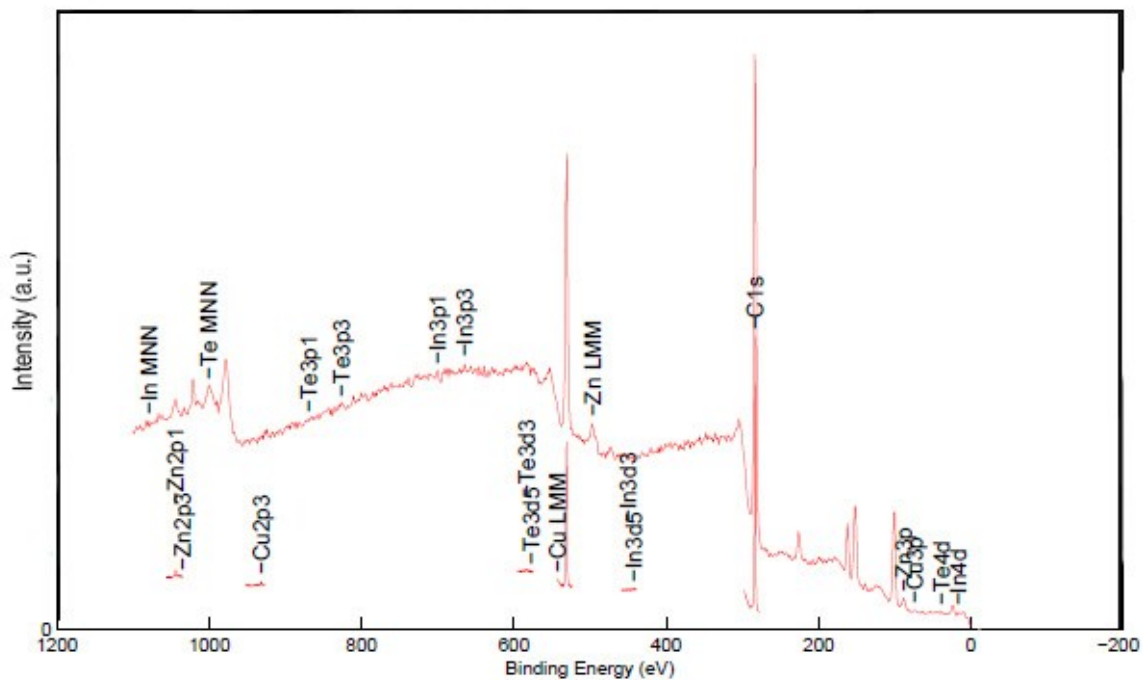

Fig. S1 XPS Survey spectrum of CuZn<sub>2</sub>InTe<sub>4</sub>, showing peaks of Cu, Zn, In and Te along with oxygen and carbon peaks.

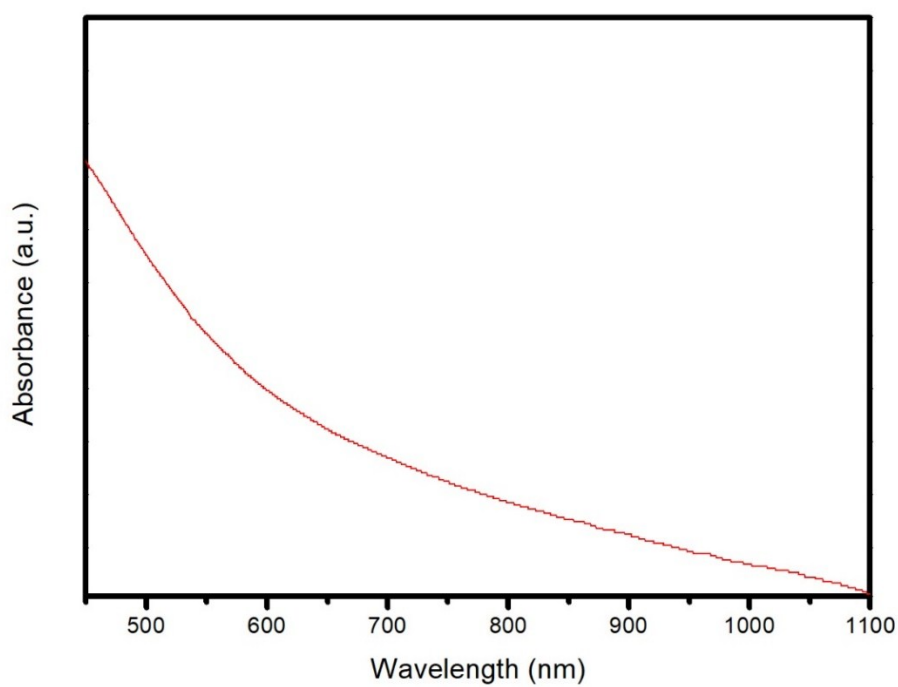

Fig. S2 UV-Visible-NIR absorption spectra of CuZn<sub>2</sub>InTe<sub>4</sub>.

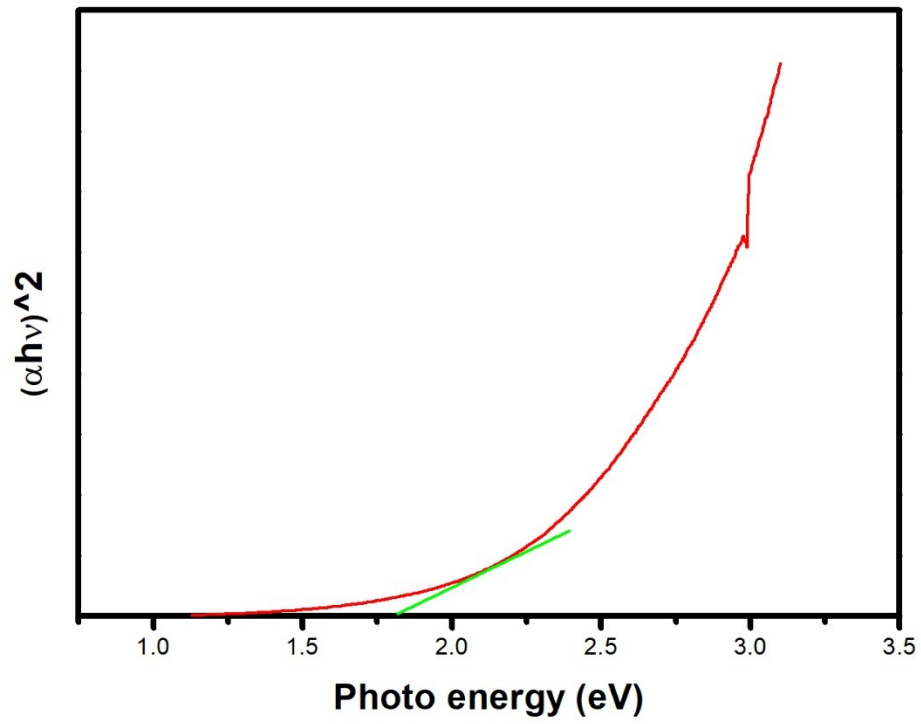

Fig. S3 Tauc plot of CuZn<sub>2</sub>InTe<sub>4</sub>.

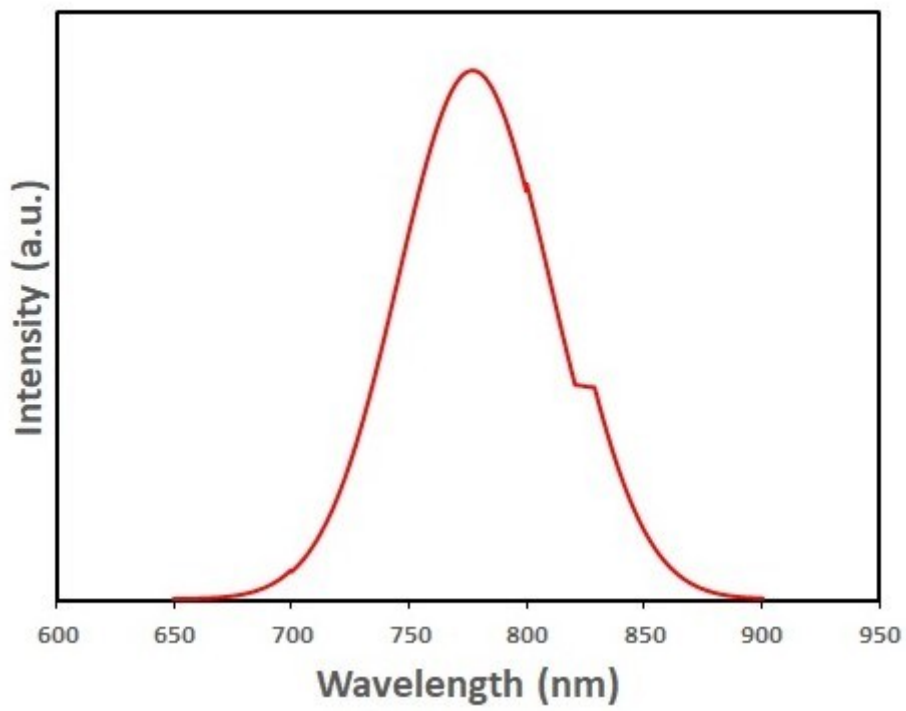

Fig. S4 Photoluminescence spectra of CuZn<sub>2</sub>InTe<sub>4</sub>.
